# Supplementary material for: Fibroblasts’ secretome from calcified and non-calcified dermis in Pseudoxanthoma elasticum differently contributes to elastin calcification
Source: PubMed Central journal article supplement (PMC11099146; doi:10.1038/s42003-024-06283-6), 2024-05-16
Supplement: 42003_2024_6283_MOESM1_ESM.pdf [file 42003_2024_6283_MOESM1_ESM.pdf]

## Supplementary Information

### **Fibroblasts' secretome from calcified and non-calcified dermis in *Pseudoxanthoma elasticum* differently contributes to elastin calcification.**

Francesco Demetrio Lofaro, Sonia Costa, Maria Luisa Simone, Daniela Quaglino\*, Federica Boraldi\*

Department of Life Sciences, University of Modena and Reggio Emilia, Modena, Italy

\*Corresponding authors:

[daniela.quaglino@unimore.it](mailto:daniela.quaglino@unimore.it)

[federica.boraldi@unimore.it](mailto:federica.boraldi@unimore.it)

This file includes:

**Supplementary Table 1** List of a) candidates for reference genes and of b) target genes.

**Supplementary Figure 1** Uncropped immunoblot images in CUS and CAS secretome for decorin, perlecan and HMGB1.

**Supplementary Figure 2** Representative light microscopy image of insoluble elastin coacervated in presence of 200 µg heparan sulphate.

**Supplementary Figure 3** Flow chart for the identification of reference genes.

**Supplementary Figure 4** Gene stability rankings derived from four computational programs.

**Supplementary Table 1.** List of a) candidates for reference genes and of b) target genes.

| Gene acronymous                          | Gene name                                                                  | Gene function                                                                                                             | Gene ID   | Code HS<br>(ThermoFisher Scientific) |
|------------------------------------------|----------------------------------------------------------------------------|---------------------------------------------------------------------------------------------------------------------------|-----------|--------------------------------------|
| <b>a) candidates for reference genes</b> |                                                                            |                                                                                                                           |           |                                      |
| <b>18S</b>                               | RNA, 18S ribosomal 1                                                       | Essential component of 18S ribosomal subunit.                                                                             | 106632259 | Hs99999901_s1                        |
| <b>ACTB</b>                              | $\beta$ -actin                                                             | Major constituent of the contractile apparatus.                                                                           | 60        | Hs01060665_g1                        |
| <b>B2M</b>                               | $\beta$ -2-microglobulin                                                   | Serum protein associated to heavy chain of histocompatibility complex.                                                    | 567       | Hs00187842_m1                        |
| <b>GAPDH</b>                             | Glyceraldehyde-phosphate dehydrogenase                                     | Enzyme in glycolysis and gluconeogenesis.                                                                                 | 138400    | Hs02786624_g1                        |
| <b>HMBS</b>                              | Hydroxymethylbilane synthase                                               | Enzyme involved in heme biosynthetic pathway.                                                                             | 3145      | Hs00609297_m1                        |
| <b>HPRT1</b>                             | Hypoxanthine phosphoribosyl-transferase 1                                  | Enzyme involved in purine synthesis.                                                                                      | 3251      | Hs02800695_m1                        |
| <b>RPL13A</b>                            | Ribosomal protein L13a                                                     | Structural component of 60S ribosomal subunit.                                                                            | 40687     | Hs 04194366_g1                       |
| <b>SDHA</b>                              | Succinate dehydrogenase complex flavoprotein subunit A                     | Major catalytic subunit of succinate-ubiquinone oxidoreductase, essential complex of the mitochondrial respiratory chain. | 6389      | Hs07291714_mH                        |
| <b>TBP</b>                               | TATA-box binding protein                                                   | Component of transcription factor IID (TFIID) is able to bind TATA box.                                                   | 600075    | Hs00427620_m1                        |
| <b>UBC</b>                               | Ubiquitin C                                                                | Polyubiquitin precursor.                                                                                                  | 7316      | Hs00824723_m1                        |
| <b>YWHAZ</b>                             | Tyrosine3-monooxygenase/tryptophan 5-monooxygenase activation protein zeta | Signal transduction                                                                                                       | 7534      | Hs03044281_g1                        |
| <b>b) target genes</b>                   |                                                                            |                                                                                                                           |           |                                      |
| <b>BMP2</b>                              | Bone morphogenetic protein 2                                               | Growth factor of the TGF-beta superfamily involved in essential processes as cartilage and bone formation.                | 650       | Hs00154192_m1                        |
| <b>PXN</b>                               | Paxillin                                                                   | Cytoskeletal protein that is part of the focal adhesion components.                                                       | 5829      | Hs01104424_m1                        |

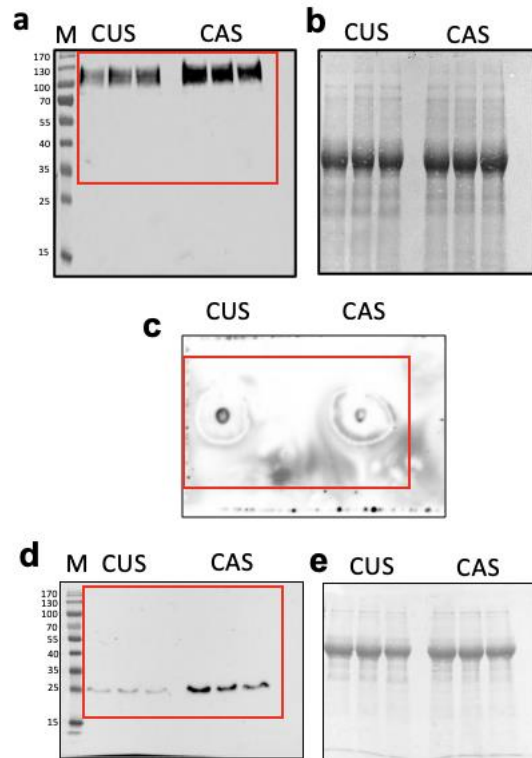

**Supplementary Figure 1. Uncropped immunoblot images for decorin, perlecan and HMGB1 in CUS and CAS secretome.** Uncropped immunoblot images for decorin protein content **(a)** normalized against the amount the total protein content revealed by Ponceau S **(b)**; for perlecan quantification **(c)**; for HMGB1 protein content **(d)** normalized against the amount the total protein content revealed by Ponceau S **(e)**. The area blot chosen for publication (Figure 5 a, 5b and 6a) is delimited by a red rectangle and the size ladder is aligned with them.

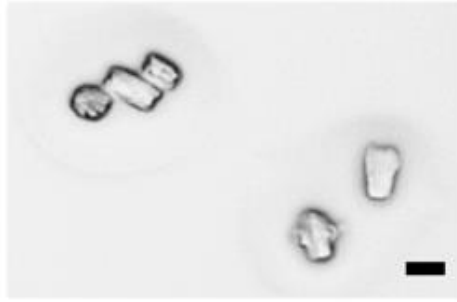

**Supplementary Figure 2.** Representative light microscopy image of insoluble elastin coacervated in the presence of 200  $\mu\text{g}$  heparan sulphate. Scale bar: 10  $\mu\text{m}$ .

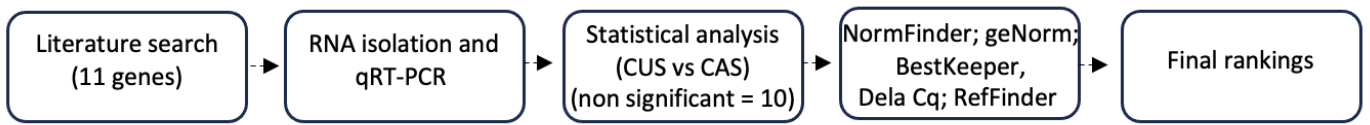

**Supplementary Figure 3.** Flow chart for the identification of reference genes.

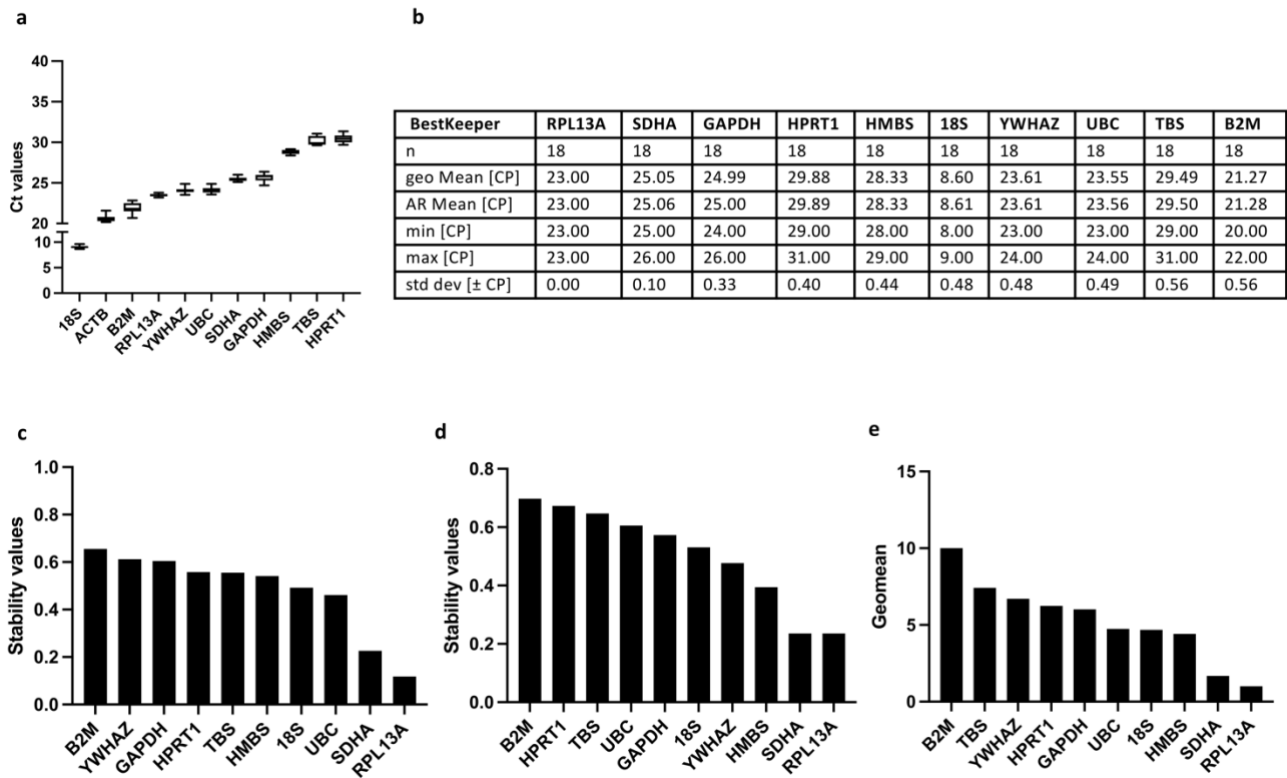

**Supplementary Figure 4.** **a** Mean Ct values of each candidate reference gene are shown in a box-and-whisker plot and sorted from the lowest (left) to the highest (right). **b** Bestkeeper candidate reference gene ranking sorted according to their SD and CV% values and their crossing point (CP). **c** NormFinder ranking based on stability value. Candidate reference genes are plotted based on their stability value from the least (left) to the most stable (right). **d** geNorm ranking of stability M value. Candidate reference genes are plotted based on their stability M value from the least (left) to the most stable (right). **e** According to the gene stability rankings derived from four computational programs, RefFinder calculates the geometric mean of weights for the final ranking.
