# Supplementary material for: Fibroblasts’ secretome from calcified and non-calcified dermis in Pseudoxanthoma elasticum differently contributes to elastin calcification
Source: PubMed Central journal article supplement (PMC11099146; doi:10.1038/s42003-024-06283-6), 2024-05-16
Supplement: 42003_2024_6283_MOESM2_ESM.pdf [file 42003_2024_6283_MOESM2_ESM.pdf]

## Description of Additional Supplementary Files

**File name:** Supplementary Data 1

**Description:** List of proteins identified by LCMS/MS in clinically unaffected (CUS) and clinically affected skin (CAS) secretome.

**File name:** Supplementary Data 2

**Description:** Label free quantification of proteins identified with at least two peptides in clinically unaffected (CUS) and clinically affected (CAS) skin secretome.

**File name:** Supplementary Data 3

**Description:** Protease and protease inhibitors identified in clinically unaffected (CUS) and clinically affected (CAS) skin classified using functional annotation integrated in PantherDB.

**File name:** Supplementary Data 4

**Description:** The source data behind the graphs in the main and Supplementary Figures.
